# Supplementary material for: Neural tube defects as a cause of death among stillbirths, infants, and children younger than 5 years in sub-Saharan Africa and southeast Asia: an analysis of the CHAMPS network
Source: PubMed Central journal article supplement (PMC10282076; doi:10.1016/s2214-109x(23)00191-2), 2023-06-01
Supplement: mmc1.pdf [file mmc1.pdf]

# THE LANCET

## Global Health

### Supplementary appendix

This appendix formed part of the original submission and has been peer reviewed. We post it as supplied by the authors.

Supplement to: Madrid L, Vyas KJ, Kancherla V, et al. Neural tube defects as a cause of death among stillbirths, infants, and children younger than 5 years in sub-Saharan Africa and southeast Asia: an analysis of the CHAMPS network. *Lancet Glob Health* 2023; published online June 1. [https://doi.org/10.1016/S2214-109X\(23\)00191-2](https://doi.org/10.1016/S2214-109X(23)00191-2).

## **Appendix**

**Neural tube defects as a cause of death among stillbirths and children under five in Sub-Saharan Africa and South-East Asia – A population-based analysis of the CHAMPS network.**

**Supplemental Table 1. Published studies on the prevalence of neural tube defects in CHAMPS sites.**

| Site                      | Author                  | Surveillance characteristics                                 |           |           | Pregnancy outcomes surveyed |                | Prevalence (per 10 000 births) |             |              |
|---------------------------|-------------------------|--------------------------------------------------------------|-----------|-----------|-----------------------------|----------------|--------------------------------|-------------|--------------|
|                           |                         | Region                                                       | Period    | Source    | Numerator                   | Denominator    | All NTDs                       | Anencephaly | Spina bifida |
| Bangladesh                | Dey et al., 2010        | Dhaka                                                        | 2006-2007 | Hospital  | LB                          | LB             | 15                             | 3           | 0            |
|                           | Kindie et al., 2022     | North Shewa                                                  | 2017-2019 | Hospital  | LB, ETOPFA, SB              | LB, ETOPFA, SB | 109                            | 56          | 35           |
| Ethiopia                  | Berihu et al., 2018     | Tigray                                                       | 2016-2017 | Hospital  | LB, SB                      | LB, SB         | 131                            | 66          | 64           |
|                           | Seyoum et al., 2018     | Amhara                                                       | 2015-2017 | Hospital  | LB, SB                      | LB, SB         | 36                             | 5           | 31           |
|                           | Gedefaw et al., 2018    | Addis Ababa                                                  | 2016-2016 | Hospital  | LB, SB                      | LB, SB         | 128                            | 69          | 52           |
|                           | Sorri et al., 2015      | Addis Ababa                                                  | 2009-2012 | Hospital  | LB, SB                      | LB, SB         | 61                             | 27          | 33           |
|                           | Taye et al., 2019       | Addis Ababa,<br>Amhara                                       | 2015-2015 | Hospital  | LB                          | LB             | 48                             | 5           | 43           |
|                           | Taye et al., 2016       | Addis Ababa,<br>Amhara                                       | 2010-2014 | Hospital  | LB                          | LB             | 38                             | 6           | 31           |
|                           | Mekonen et al., 2015    | Tigray                                                       | 2011-2012 | Hospital  | LB                          | LB             | 132                            | 7           | 125          |
|                           | Abdu et al., 2019       | Amhara                                                       | 2015-2017 | Hospital  | LB                          | LB             | 59                             |             | 53           |
|                           | Abebe et al., 2019      | Oromia                                                       | 2011-2015 | Hospital  | LB, SB                      | LB, SB         | 26                             | 14          | 11           |
|                           | Mitiku et al., 2017     | Addis Ababa                                                  | 2017-2017 | Hospital  | LB, ETOPFA, SB              | LB, ETOPFA, SB | 281                            | 238         |              |
|                           | Adane et al., 2018      | Amhara                                                       | 2015-2017 | Hospital  | LB, SB                      | LB, SB         | 52                             | 4           | 27           |
|                           | Legesse et al., 2019    | Addis Ababa                                                  | 2018-2019 | Hospital  | LB, SB                      | LB, SB         | 63                             |             |              |
|                           | Kenya                   | Githuku et al., 2014                                         | Kijabe    | 2005-2010 | Hospital                    | LB, SB         | LB                             | 3           |              |
| Muga et al., 2009         |                         | Nairobi                                                      | 1983-1984 | Hospital  | LB, SB                      | LB, SB         | 50                             |             |              |
| Mali <sup>1</sup>         |                         |                                                              |           |           |                             |                |                                |             |              |
| Mozambique <sup>1</sup>   |                         |                                                              |           |           |                             |                |                                |             |              |
| Sierra Leone <sup>1</sup> |                         |                                                              |           |           |                             |                |                                |             |              |
| South Africa              | Sayed et al., 2008      | Eastern Cape,<br>KwaZulu Natal,<br>Mpumalanga,<br>Free State | 2004-2005 | Hospital  | LB, SB                      | LB, SB         | 10                             | 4           | 5            |
|                           | Krzesinski et al., 2019 | Western Cape                                                 | 2003-2013 | Hospital  | LB, SB                      | LB, SB         | 8                              | 3           | 3            |

ETOPFA, elective termination of pregnancy for fetal anomalies; LB, live-births; NTD, neural tube defects; SB, stillbirths.

<sup>1</sup>Mali, Mozambique, and Sierra Leone did not have any published studies on NTD prevalence.

## DEFINITIONS.

- **Stillbirths:** no spontaneous breathing or movement at the time of delivery and [1] weighing >1 kg or [2] estimated gestational age  $\geq 28$  weeks
- **Neonates:** live-born babies aged 1–28 days
- **Infants:** aged 29–364 days
- **Children:** aged 1–5 years
- **Seasonality:**
  - The Bangladesh dry season was defined as November– May and the rainy season as June–October;
  - the Ethiopia dry season was October–May and the rainy season was June–September;
  - the Kenya dry season was July and December–March and the rainy season was April–June and August–November;
  - the Mali dry season was November–May and the rainy season was June–October;
  - the Mozambique dry season was May–October and the rainy season was November–April;
  - the Sierra Leone dry season was October–May and the rainy season was June– September;
  - the South Africa dry season was March– November and the rainy season was December–February

**BANGLADESH**

**Supplemental Table 2. Frequency of deaths in the target population that are enrolled in CHAMPS, consented for MITS and are DeCoDed as of May 24, 2022, and attributed neural tube defect as a cause of death anywhere in the causal chain, by study period and age.**

| Site       | Age          | CHAMPS | Target | MITS | NTD | Catchment  | Age               | DSS only | CHAMPS | Target | MITS | NTD      | Live-births | Catchment         | Age          | CHAMPS | Target | MITS | NTD |
|------------|--------------|--------|--------|------|-----|------------|-------------------|----------|--------|--------|------|----------|-------------|-------------------|--------------|--------|--------|------|-----|
| Bangladesh | 2017         |        |        |      |     | Baliakandi | 2017              |          |        |        |      | Faridpur | 2017        |                   |              |        |        |      |     |
|            | Stillbirth   | 28     | 28     | 0    | 0   |            | Stillbirth        | 1        | 28     | 29     | 0    |          | 0           | 4787 <sup>1</sup> | Stillbirth   |        |        |      |     |
|            | Neonate      | 38     | 38     | 5    | 0   |            | Neonate           | 1        | 38     | 39     | 5    |          | 0           |                   | Neonate      |        |        |      |     |
|            | Infant/Child | 10     | 10     | 0    | 0   |            | Infant/Child      | 0        | 10     | 10     | 0    |          | 0           |                   | Infant/Child |        |        |      |     |
|            | 2018         |        |        |      |     |            | 2018              |          |        |        |      |          | 2018        |                   |              |        |        |      |     |
|            | Stillbirth   | 136    | 136    | 20   | 0   |            | Stillbirth        | 18       | 126    | 144    | 10   |          | 0           | 4078              | Stillbirth   | 10     | 10     | 10   | 0   |
|            | Neonate      | 113    | 113    | 19   | 1   |            | Neonate           | 7        | 105    | 112    | 11   |          | 0           |                   | Neonate      | 8      | 8      | 8    | 1   |
|            | Infant/Child | 44     | 44     | 1    | 0   |            | Infant/Child      | 4        | 44     | 48     | 1    |          | 0           |                   | Infant/Child | 0      | 0      | 0    | 0   |
|            | 2019         |        |        |      |     |            | 2019              |          |        |        |      |          | 2019        |                   |              |        |        |      |     |
|            | Stillbirth   | 159    | 159    | 53   | 0   |            | Stillbirth        | 21       | 117    | 138    | 11   |          | 0           | 5193              | Stillbirth   | 42     | 42     | 42   | 0   |
|            | Neonate      | 178    | 178    | 55   | 1   |            | Neonate           | 28       | 148    | 176    | 25   |          | 0           |                   | Neonate      | 30     | 30     | 30   | 1   |
|            | Infant/Child | 46     | 46     | 2    | 0   |            | Infant/Child      | 6        | 44     | 50     | 0    |          | 0           |                   | Infant/Child | 2      | 2      | 2    | 0   |
|            | 2020         |        |        |      |     |            | 2020              |          |        |        |      |          | 2020        |                   |              |        |        |      |     |
|            | Stillbirth   | 177    | 177    | 26   | 1   |            | Stillbirth        | 47       | 161    | 208    | 10   |          | 0           | 5090              | Stillbirth   | 16     | 16     | 16   | 1   |
|            | Neonate      | 152    | 152    | 30   | 0   |            | Neonate           | 19       | 132    | 151    | 10   |          | 0           |                   | Neonate      | 20     | 20     | 20   | 0   |
|            | Infant/Child | 47     | 47     | 0    | 0   |            | Infant/Child      | 8        | 47     | 55     | 0    |          | 0           |                   | Infant/Child | 0      | 0      | 0    | 0   |
|            | 2021         |        |        |      |     |            | 2021 <sup>2</sup> |          |        |        |      |          | 2021        |                   |              |        |        |      |     |
|            | Stillbirth   | 149    | 149    | 49   | 1   |            | Stillbirth        | 47       | 85     | 132    | 12   |          | 0           | 5090 <sup>2</sup> | Stillbirth   | 64     | 64     | 37   | 1   |
|            | Neonate      | 146    | 146    | 48   | 0   |            | Neonate           | 19       | 80     | 99     | 6    |          | 0           |                   | Neonate      | 66     | 66     | 42   | 0   |
|            | Infant/Child | 43     | 43     | 1    | 0   |            | Infant/Child      | 8        | 42     | 50     | 0    |          | 0           |                   | Infant/Child | 1      | 1      | 1    | 0   |
|            | 2017-2021    |        |        |      |     |            | 2017-2021         |          |        |        |      |          | 2018-2021   |                   |              |        |        |      |     |
|            | Stillbirth   | 649    | 649    | 148  | 2   |            | Stillbirth        | 134      | 517    | 651    | 43   |          | 0           | 24 238            | Stillbirth   | 132    | 132    | 105  | 2   |
|            | Neonate      | 627    | 627    | 157  | 2   |            | Neonate           | 74       | 503    | 577    | 57   |          | 0           |                   | Neonate      | 124    | 124    | 100  | 2   |
|            | Infant/Child | 190    | 190    | 4    | 0   |            | Infant/Child      | 26       | 187    | 213    | 1    |          | 0           |                   | Infant/Child | 3      | 3      | 3    | 0   |

<sup>1</sup>Imputed simple average using all the years for which live-birth data were available.

<sup>2</sup>2021 DSS data not available; substituted 2020 DSS data.

## ETHIOPIA

**Supplemental Table 3. Frequency of deaths in the target population that are enrolled in CHAMPS, consented for MITS and are DeCoDed as of May 24, 2022, and attributed neural tube defect as a cause of death anywhere in the causal chain, by study period and age.**

| Site         | Age               | DSS only | CHAMPS | Target | MITS | NTD          | Live-births       | Catchment | Age               | DSS only | CHAMPS | Target | MITS   | NTD | Live-births       |  |
|--------------|-------------------|----------|--------|--------|------|--------------|-------------------|-----------|-------------------|----------|--------|--------|--------|-----|-------------------|--|
| Ethiopia     | 2019              |          |        |        |      |              |                   | Haramaya  | 2019              |          |        |        |        |     |                   |  |
|              | Stillbirth        | 75       | 33     | 108    | 22   | 1            | 3022              |           | Stillbirth        |          |        |        |        |     |                   |  |
|              | Neonate           | 62       | 37     | 99     | 17   | 2            |                   |           | Neonate           |          |        |        |        |     |                   |  |
|              | Infant/Child      | 477      | 48     | 525    | 12   | 1            |                   |           | Infant/Child      |          |        |        |        |     |                   |  |
|              | 2020              |          |        |        |      |              |                   |           | 2020              |          |        |        |        |     |                   |  |
|              | Stillbirth        | 85       | 93     | 178    | 74   | 14           | 7995              |           | Stillbirth        | 32       | 32     | 64     | 27     | 9   | 3210              |  |
|              | Neonate           | 58       | 67     | 125    | 39   | 1            |                   |           | Neonate           | 4        | 14     | 18     | 8      | 0   |                   |  |
|              | Infant/Child      | 540      | 44     | 584    | 8    | 0            |                   |           | Infant/Child      | 158      | 6      | 164    | 1      | 0   |                   |  |
|              | 2021 <sup>1</sup> |          |        |        |      |              |                   |           | 2021 <sup>1</sup> |          |        |        |        |     |                   |  |
|              | Stillbirth        | 85       | 217    | 302    | 103  | 23           | 7995 <sup>1</sup> |           | Stillbirth        | 32       | 74     | 106    | 43     | 14  | 3210 <sup>1</sup> |  |
| Neonate      | 58                | 129      | 187    | 32     | 2    | Neonate      |                   | 4         | 26                | 30       | 11     | 1      |        |     |                   |  |
| Infant/Child | 540               | 71       | 611    | 5      | 0    | Infant/Child |                   | 158       | 3                 | 161      | 1      | 0      |        |     |                   |  |
| 2019-2021    |                   |          |        |        |      |              | 2019-2021         |           |                   |          |        |        |        |     |                   |  |
| Stillbirth   | 245               | 343      | 588    | 199    | 38   | 19 012       | Stillbirth        | 64        | 106               | 170      | 70     | 23     | 6420   |     |                   |  |
| Neonate      | 178               | 233      | 411    | 88     | 5    |              | Neonate           | 8         | 40                | 48       | 19     | 1      |        |     |                   |  |
| Infant/Child | 1557              | 163      | 1720   | 25     | 1    |              | Infant/Child      | 316       | 9                 | 325      | 2      | 0      |        |     |                   |  |
| Catchment    | Age               | DSS only | CHAMPS | Target | MITS | NTD          | Live-births       | Catchment | Age               | DSS only | CHAMPS | Target | MITS   | NTD | Live-births       |  |
| Harar        | 2019              |          |        |        |      |              |                   | Kersa     | 2019              |          |        |        |        |     |                   |  |
|              | Stillbirth        | 8        | 19     | 27     | 15   | 1            | 469               |           | Stillbirth        | 67       | 14     | 81     | 7      | 0   | 2553              |  |
|              | Neonate           | 1        | 17     | 18     | 13   | 2            |                   |           | Neonate           | 61       | 18     | 79     | 4      | 0   |                   |  |
|              | Infant/Child      | 10       | 3      | 13     | 3    | 0            |                   |           | Infant/Child      | 467      | 44     | 511    | 9      | 1   |                   |  |
|              | 2020              |          |        |        |      |              |                   |           | 2020              |          |        |        |        |     |                   |  |
|              | Stillbirth        | 4        | 34     | 38     | 27   | 1            | 768               |           | Stillbirth        | 49       | 27     | 76     | 20     | 4   | 4017              |  |
|              | Neonate           | 1        | 31     | 32     | 24   | 1            |                   |           | Neonate           | 53       | 22     | 75     | 7      | 0   |                   |  |
|              | Infant/Child      | 12       | 0      | 12     | 0    | 0            |                   |           | Infant/Child      | 370      | 38     | 408    | 7      | 0   |                   |  |
|              | 2021 <sup>1</sup> |          |        |        |      |              |                   |           | 2021 <sup>1</sup> |          |        |        |        |     |                   |  |
|              | Stillbirth        | 4        | 34     | 38     | 17   | 1            | 768 <sup>1</sup>  |           | Stillbirth        | 49       | 109    | 158    | 43     | 8   | 4017 <sup>1</sup> |  |
| Neonate      | 1                 | 21       | 22     | 8      | 1    | Neonate      |                   | 53        | 82                | 135      | 13     | 0      |        |     |                   |  |
| Infant/Child | 12                | 1        | 13     | 0      | 0    | Infant/Child |                   | 370       | 67                | 437      | 4      | 0      |        |     |                   |  |
| 2019-2021    |                   |          |        |        |      |              | 2019-2021         |           |                   |          |        |        |        |     |                   |  |
| Stillbirth   | 16                | 87       | 103    | 59     | 3    | 2005         | Stillbirth        | 165       | 150               | 315      | 70     | 12     | 10 587 |     |                   |  |
| Neonate      | 3                 | 69       | 72     | 45     | 4    |              | Neonate           | 167       | 122               | 289      | 24     | 0      |        |     |                   |  |
| Infant/Child | 34                | 4        | 38     | 3      | 0    |              | Infant/Child      | 1207      | 149               | 1356     | 20     | 1      |        |     |                   |  |

<sup>1</sup>2021 DSS data not available; substituted 2020 DSS data.

**KENYA**

**Supplemental Table 4. Frequency of deaths in the target population that are enrolled in CHAMPS, consented for MITS and are DeCoDed as of May 24, 2022, and attributed neural tube defect as a cause of death anywhere in the causal chain, by study period and age.**

| Site         | Age               | DSS only | CHAMPS | Target | MITS | NTD    | Live-births       | Catchment | Age               | DSS only | CHAMPS | Target | MITS | NTD          | Live-births       | Catchment | Age               | DSS only | CHAMPS | Target | MITS | NTD | Live-births       |
|--------------|-------------------|----------|--------|--------|------|--------|-------------------|-----------|-------------------|----------|--------|--------|------|--------------|-------------------|-----------|-------------------|----------|--------|--------|------|-----|-------------------|
| Kenya        | 2017              |          |        |        |      |        |                   | Manyatta  | 2017              |          |        |        |      |              |                   | Siaya     | 2017              |          |        |        |      |     |                   |
|              | Stillbirth        | 52       | 21     | 73     | 11   | 0      | 3129              |           | Stillbirth        | 0        | 11     | 11     | 10   | 0            | 1196 <sup>1</sup> |           | Stillbirth        | 52       | 10     | 62     | 1    | 0   | 1933              |
|              | Neonate           | 102      | 16     | 118    | 8    | 0      |                   |           | Neonate           | 2        | 9      | 11     | 7    | 0            |                   |           | Neonate           | 100      | 7      | 107    | 1    | 0   |                   |
|              | Infant/Child      | 429      | 43     | 472    | 29   | 0      |                   |           | Infant/Child      | 4        | 24     | 28     | 23   | 0            |                   |           | Infant/Child      | 425      | 19     | 444    | 6    | 0   |                   |
|              | 2018              |          |        |        |      |        |                   |           | 2018              |          |        |        |      |              |                   |           | 2018              |          |        |        |      |     |                   |
|              | Stillbirth        | 14       | 51     | 65     | 29   | 0      | 3283              |           | Stillbirth        | 1        | 24     | 25     | 19   | 0            | 1233              |           | Stillbirth        | 13       | 27     | 40     | 10   | 0   | 2050              |
|              | Neonate           | 64       | 77     | 141    | 43   | 0      |                   |           | Neonate           | 11       | 35     | 46     | 28   | 0            |                   |           | Neonate           | 53       | 42     | 95     | 15   | 0   |                   |
|              | Infant/Child      | 219      | 101    | 320    | 62   | 0      |                   |           | Infant/Child      | 27       | 36     | 63     | 32   | 0            |                   |           | Infant/Child      | 192      | 65     | 257    | 30   | 0   |                   |
|              | 2019              |          |        |        |      |        |                   |           | 2019              |          |        |        |      |              |                   |           | 2019              |          |        |        |      |     |                   |
|              | Stillbirth        | 15       | 65     | 80     | 52   | 0      | 3146              |           | Stillbirth        | 2        | 25     | 27     | 23   | 0            | 1158              |           | Stillbirth        | 13       | 40     | 53     | 29   | 0   | 1988              |
|              | Neonate           | 61       | 70     | 131    | 51   | 1      |                   |           | Neonate           | 9        | 32     | 41     | 31   | 0            |                   |           | Neonate           | 52       | 38     | 90     | 20   | 1   |                   |
|              | Infant/Child      | 256      | 105    | 361    | 88   | 0      |                   |           | Infant/Child      | 26       | 41     | 67     | 39   | 0            |                   |           | Infant/Child      | 230      | 64     | 294    | 49   | 0   |                   |
|              | 2020              |          |        |        |      |        |                   |           | 2020              |          |        |        |      |              |                   |           | 2020              |          |        |        |      |     |                   |
|              | Stillbirth        | 27       | 48     | 75     | 40   | 0      | 3186              |           | Stillbirth        | 1        | 19     | 20     | 17   | 0            | 1196 <sup>1</sup> |           | Stillbirth        | 26       | 29     | 55     | 23   | 0   | 1990 <sup>1</sup> |
|              | Neonate           | 64       | 49     | 113    | 40   | 0      |                   |           | Neonate           | 30       | 31     | 61     | 25   | 0            |                   |           | Neonate           | 34       | 18     | 52     | 15   | 0   |                   |
|              | Infant/Child      | 89       | 37     | 126    | 28   | 0      |                   |           | Infant/Child      | 17       | 18     | 35     | 15   | 0            |                   |           | Infant/Child      | 72       | 19     | 91     | 13   | 0   |                   |
|              | 2021 <sup>2</sup> |          |        |        |      |        |                   |           | 2021 <sup>2</sup> |          |        |        |      |              |                   |           | 2021 <sup>2</sup> |          |        |        |      |     |                   |
|              | Stillbirth        | 27       | 54     | 81     | 16   | 0      | 3186 <sup>2</sup> |           | Stillbirth        | 1        | 24     | 25     | 7    | 0            | 1196 <sup>2</sup> |           | Stillbirth        | 26       | 30     | 56     | 9    | 0   | 1990 <sup>2</sup> |
|              | Neonate           | 64       | 58     | 122    | 25   | 0      |                   |           | Neonate           | 30       | 31     | 61     | 18   | 0            |                   |           | Neonate           | 34       | 27     | 61     | 7    | 0   |                   |
|              | Infant/Child      | 89       | 84     | 173    | 24   | 0      |                   |           | Infant/Child      | 17       | 33     | 50     | 9    | 0            |                   |           | Infant/Child      | 72       | 51     | 123    | 15   | 0   |                   |
|              | 2017-2021         |          |        |        |      |        |                   |           | 2017-2021         |          |        |        |      |              |                   |           | 2017-2021         |          |        |        |      |     |                   |
| Stillbirth   | 135               | 239      | 374    | 148    | 0    | 15 930 | Stillbirth        | 5         | 103               | 108      | 76     | 0      | 5979 | Stillbirth   | 130               | 136       | 266               | 72       | 0      | 9951   |      |     |                   |
| Neonate      | 355               | 270      | 625    | 167    | 1    |        | Neonate           | 82        | 138               | 220      | 109    | 0      |      | Neonate      | 273               | 132       | 405               | 58       | 1      |        |      |     |                   |
| Infant/Child | 1082              | 370      | 1452   | 231    | 0    |        | Infant/Child      | 91        | 152               | 243      | 118    | 0      |      | Infant/Child | 991               | 218       | 1209              | 113      | 0      |        |      |     |                   |

<sup>1</sup>Imputed simple average using all the years for which live-birth data were available.

<sup>2</sup>2021 DSS data not available; substituted 2020 DSS data.

## MALI

**Supplemental Table 5. Frequency of deaths in the target population that are enrolled in CHAMPS, consented for MITS and are DeCoDed as of May 24, 2022, and attributed neural tube defect as a cause of death anywhere in the causal chain, by study period and age.**

| Catchment    | Age          | CHAMPS            | Target <sup>1</sup> | MITS | NTD    | Live-births       |
|--------------|--------------|-------------------|---------------------|------|--------|-------------------|
| Bamako       |              | 2017              |                     |      |        |                   |
|              | Stillbirth   | 40                | 40                  | 4    | 0      | 6708              |
|              | Neonate      | 58                | 58                  | 9    | 0      |                   |
|              | Infant/Child | 61                | 61                  | 12   | 0      |                   |
|              |              | 2018              |                     |      |        |                   |
|              | Stillbirth   | 121               | 121                 | 26   | 0      | 6624              |
|              | Neonate      | 106               | 106                 | 32   | 0      |                   |
|              | Infant/Child | 94                | 94                  | 12   | 0      |                   |
|              |              | 2019              |                     |      |        |                   |
|              | Stillbirth   | 172               | 172                 | 32   | 0      | 7602              |
|              | Neonate      | 136               | 136                 | 24   | 0      |                   |
|              | Infant/Child | 144               | 144                 | 19   | 0      |                   |
|              |              | 2020              |                     |      |        |                   |
|              | Stillbirth   | 37                | 37                  | 8    | 0      | 6978 <sup>2</sup> |
|              | Neonate      | 33                | 33                  | 7    | 0      |                   |
|              | Infant/Child | 31                | 31                  | 8    | 0      |                   |
|              |              | 2021 <sup>3</sup> |                     |      |        |                   |
|              | Stillbirth   | 79                | 79                  | 11   | 0      | 6978 <sup>3</sup> |
| Neonate      | 91           | 91                | 3                   | 0    |        |                   |
| Infant/Child | 40           | 40                | 1                   | 0    |        |                   |
|              | 2017-2021    |                   |                     |      |        |                   |
| Stillbirth   | 449          | 449               | 81                  | 0    | 34 890 |                   |
| Neonate      | 424          | 424               | 75                  | 0    |        |                   |
| Infant/Child | 373          | 373               | 52                  | 0    |        |                   |

<sup>1</sup>Includes DSS only data.

<sup>2</sup>Imputed simple average using all the years for which live-birth data were available.

<sup>3</sup>2021 DSS data not available; substituted 2020 DSS data.



## MOZAMBIQUE

**Supplemental Table 6. Frequency of deaths in the target population that are enrolled in CHAMPS, consented for MITS and are DeCoDed as of May 24, 2022, and attributed neural tube defect as a cause of death anywhere in the causal chain, by study period and age.**

| Site         | Age          | CHAMPS | Target | MITS | NTD          | Catchment | Age               | DSS only | CHAMPS | Target    | MITS         | NTD          | Live-births | Catchment         | Age          | CHAMPS | Target | MITS | NTD |
|--------------|--------------|--------|--------|------|--------------|-----------|-------------------|----------|--------|-----------|--------------|--------------|-------------|-------------------|--------------|--------|--------|------|-----|
| Mozambique   | 2017         |        |        |      |              | Manhica   | 2017              |          |        |           |              | Quelimane    | 2017        |                   |              |        |        |      |     |
|              | Stillbirth   | 38     | 38     | 20   | 0            |           | Stillbirth        | 26       | 38     | 64        | 20           |              | 0           | 5459              | Stillbirth   |        |        |      |     |
|              | Neonate      | 74     | 74     | 28   | 0            |           | Neonate           | 99       | 74     | 173       | 28           |              | 0           |                   | Neonate      |        |        |      |     |
|              | Infant/Child | 127    | 127    | 26   | 0            |           | Infant/Child      | 173      | 127    | 300       | 26           |              | 0           |                   | Infant/Child |        |        |      |     |
|              | 2018         |        |        |      |              |           | 2018              |          |        |           |              |              | 2018        |                   |              |        |        |      |     |
|              | Stillbirth   | 62     | 62     | 25   | 0            |           | Stillbirth        | 71       | 62     | 133       | 25           |              | 0           | 5615              | Stillbirth   |        |        |      |     |
|              | Neonate      | 65     | 65     | 28   | 0            |           | Neonate           | 85       | 65     | 150       | 28           |              | 0           |                   | Neonate      |        |        |      |     |
|              | Infant/Child | 79     | 79     | 16   | 0            |           | Infant/Child      | 165      | 79     | 244       | 16           |              | 0           |                   | Infant/Child |        |        |      |     |
|              | 2019         |        |        |      |              |           | 2019              |          |        |           |              |              | 2019        |                   |              |        |        |      |     |
|              | Stillbirth   | 117    | 117    | 69   | 3            |           | Stillbirth        | 72       | 65     | 137       | 28           |              | 1           | 5567              | Stillbirth   | 52     | 52     | 41   | 2   |
|              | Neonate      | 145    | 145    | 86   | 3            |           | Neonate           | 110      | 72     | 182       | 24           |              | 1           |                   | Neonate      | 73     | 73     | 62   | 2   |
|              | Infant/Child | 105    | 105    | 39   | 0            |           | Infant/Child      | 306      | 78     | 384       | 14           |              | 0           |                   | Infant/Child | 27     | 27     | 25   | 0   |
|              | 2020         |        |        |      |              |           | 2020              |          |        |           |              |              | 2020        |                   |              |        |        |      |     |
|              | Stillbirth   | 169    | 169    | 41   | 1            |           | Stillbirth        | 112      | 62     | 219       | 26           |              | 1           | 5248              | Stillbirth   | 62     | 62     | 15   | 0   |
|              | Neonate      | 132    | 132    | 17   | 0            |           | Neonate           | 68       | 60     | 128       | 9            |              | 0           |                   | Neonate      | 72     | 72     | 8    | 0   |
|              | Infant/Child | 99     | 99     | 20   | 0            |           | Infant/Child      | 265      | 69     | 334       | 11           |              | 0           |                   | Infant/Child | 30     | 30     | 9    | 0   |
|              | 2021         |        |        |      |              |           | 2021 <sup>1</sup> |          |        |           |              |              | 2021        |                   |              |        |        |      |     |
|              | Stillbirth   | 139    | 139    | 20   | 1            |           | Stillbirth        | 112      | 139    | 251       | 20           |              | 1           | 5248 <sup>1</sup> | Stillbirth   |        |        |      |     |
| Neonate      | 170          | 170    | 7      | 0    | Neonate      | 68        | 170               | 238      | 7      | 0         | Neonate      |              |             |                   |              |        |        |      |     |
| Infant/Child | 71           | 71     | 6      | 0    | Infant/Child | 265       | 71                | 336      | 6      | 0         | Infant/Child |              |             |                   |              |        |        |      |     |
| 2017-2021    |              |        |        |      | 2017-2021    |           |                   |          |        | 2019-2020 |              |              |             |                   |              |        |        |      |     |
| Stillbirth   | 525          | 525    | 175    | 5    | Stillbirth   | 393       | 411               | 804      | 119    | 3         | 21 889       | Stillbirth   | 114         | 114               | 56           | 2      |        |      |     |
| Neonate      | 586          | 586    | 166    | 3    | Neonate      | 430       | 441               | 871      | 96     | 1         |              | Neonate      | 145         | 145               | 70           | 2      |        |      |     |
| Infant/Child | 481          | 481    | 107    | 0    | Infant/Child | 1174      | 424               | 1598     | 73     | 0         |              | Infant/Child | 57          | 57                | 34           | 0      |        |      |     |

<sup>1</sup>2021 DSS data not available; substituted 2020 DSS data.

## SIERRA LEONE

**Supplemental Table 7. Frequency of deaths in the target population that are enrolled in CHAMPS, consented for MITS and are DeCoDed as of May 24, 2022, and attributed neural tube defect as a cause of death anywhere in the causal chain, by study period and age.**

| Catchment    | Age          | CHAMPS | Target | MITS | NTD |
|--------------|--------------|--------|--------|------|-----|
| Makeni       | 2018         |        |        |      |     |
|              | Stillbirth   | 59     | 59     | 0    | 0   |
|              | Neonate      | 35     | 35     | 0    | 0   |
|              | Infant/Child | 52     | 52     | 0    | 0   |
|              | 2019         |        |        |      |     |
|              | Stillbirth   | 77     | 77     | 47   | 1   |
|              | Neonate      | 81     | 81     | 51   | 1   |
|              | Infant/Child | 110    | 110    | 74   | 0   |
|              | 2020         |        |        |      |     |
|              | Stillbirth   | 41     | 41     | 22   | 1   |
|              | Neonate      | 23     | 23     | 8    | 0   |
|              | Infant/Child | 54     | 54     | 25   | 0   |
|              | 2021         |        |        |      |     |
|              | Stillbirth   | 63     | 63     | 37   | 1   |
|              | Neonate      | 49     | 49     | 34   | 0   |
| Infant/Child | 68           | 68     | 41     | 0    |     |
| 2019-2021    |              |        |        |      |     |
| Stillbirth   | 181          | 181    | 106    | 3    |     |
| Neonate      | 153          | 153    | 93     | 1    |     |
| Infant/Child | 232          | 232    | 140    | 0    |     |

## SOUTH AFRICA

**Supplemental Table 8. Frequency of deaths in the target population that are enrolled in CHAMPS, consented for MITS and are DeCoDed as of May 24, 2022, and attributed neural tube defect as a cause of death anywhere in the causal chain, by study period and age.**

| Catchment    | Age               | DSS only | CHAMPS | Target | MITS | NTD  | Live-births       |
|--------------|-------------------|----------|--------|--------|------|------|-------------------|
| Soweto       | 2017              |          |        |        |      |      |                   |
|              | Stillbirth        | 44       | 61     | 105    | 1    | 0    | 3000 <sup>1</sup> |
|              | Neonate           | 47       | 220    | 267    | 192  | 3    |                   |
|              | Infant/Child      | 61       | 102    | 163    | 98   | 0    |                   |
|              | 2018              |          |        |        |      |      |                   |
|              | Stillbirth        | 52       | 47     | 99     | 42   | 0    | 2236 <sup>1</sup> |
|              | Neonate           | 62       | 90     | 152    | 81   | 0    |                   |
|              | Infant/Child      | 76       | 47     | 123    | 45   | 1    |                   |
|              | 2019              |          |        |        |      |      |                   |
|              | Stillbirth        | 45       | 46     | 91     | 42   | 1    | 1069 <sup>1</sup> |
|              | Neonate           | 37       | 41     | 78     | 39   | 1    |                   |
|              | Infant/Child      | 37       | 27     | 64     | 26   | 0    |                   |
|              | 2020              |          |        |        |      |      |                   |
|              | Stillbirth        | 37       | 54     | 91     | 30   | 0    | 1233 <sup>1</sup> |
|              | Neonate           | 89       | 78     | 167    | 45   | 0    |                   |
|              | Infant/Child      | 50       | 30     | 80     | 15   | 0    |                   |
|              | 2021 <sup>2</sup> |          |        |        |      |      |                   |
|              | Stillbirth        | 37       | 98     | 135    | 57   | 1    | 1233 <sup>2</sup> |
|              | Neonate           | 89       | 94     | 183    | 56   | 0    |                   |
|              | Infant/Child      | 50       | 59     | 109    | 35   | 0    |                   |
|              | 2017-2021         |          |        |        |      |      |                   |
| Stillbirth   | 215               | 306      | 521    | 172    | 2    | 8771 |                   |
| Neonate      | 324               | 523      | 847    | 413    | 4    |      |                   |
| Infant/Child | 274               | 265      | 539    | 219    | 1    |      |                   |

<sup>1</sup>Imputed for years 2017-2018; DSS data for years 2019-2020.

<sup>2</sup>2021 DSS data not available; substituted 2020 DSS data.

**Supplemental Table 9. Crude and adjusted mortality fractions and rates due to neural tube defects by site, controlling for age.**

| Site                 | Year      | MITS | NTD | cCSMF (%)<br>(90% Bayesian CrI) | aCSMF (%)<br>(90% Bayesian CrI) | Cause-specific<br>(per 10 000) |                              |
|----------------------|-----------|------|-----|---------------------------------|---------------------------------|--------------------------------|------------------------------|
|                      |           |      |     |                                 |                                 | cTU5MR<br>(90% Bayesian CrI)   | aTU5MR<br>(90% Bayesian CrI) |
| Bangladesh           |           |      |     |                                 |                                 |                                |                              |
| Target: CHAMPS       | 2017-2021 | 309  | 4   | 1.3 (0.7, 3.1)                  | 1.3 (0.9, 1.9)                  | 6.1 (3.3, 14.5)                | 6.1 (4.2, 8.9)               |
| Target: Catchment(s) | 2017-2021 | 101  | 0   | 0.0 (0.0, 3.5)                  | 0.0 (0.0, 3.5)                  | 0.0 (0.0, 20.3)                | 0.0 (0.0, 20.3)              |
| Ethiopia             | 2019-2021 | 312  | 44  | 14.1 (11.4, 17.8)               | 7.5 (6.8, 8.4)                  | 195.4 (158.0, 246.7)           | 104.0 (94.3, 116.4)          |
| Kenya                | 2017-2021 | 546  | 1   | 0.2 (0.1, 1.1)                  | 0.3 (0.2, 0.6)                  | 3.0 (1.5, 16.5)                | 4.5 (3.0, 9.0)               |
| Mali                 | 2017-2021 | 208  | 0   | 0.0 (0.0, 2.7)                  | 0.0 (0.0, 0.4)                  | 0.0 (0.0, 9.5)                 | 0.0 (0.0, 1.4)               |
| Mozambique           |           |      |     |                                 |                                 |                                |                              |
| Target: CHAMPS       | 2017-2021 | 448  | 8   | 1.8 (1.2, 3.4)                  | 1.7 (1.3, 2.4)                  | 26.3 (17.5, 49.7)              | 24.8 (19.0, 35.1)            |
| Target: Catchment(s) | 2017-2021 | 288  | 4   | 1.4 (0.9, 3.5)                  | 1.1 (0.7, 3.1)                  | 20.2 (13.0, 50.5)              | 15.9 (10.1, 44.7)            |
| Sierra Leone         | 2019-2021 | 339  | 4   | 1.2 (0.8, 3.0)                  | 1.2 (0.8, 2.4)                  | 11.0 (7.4, 27.6)               | 11.0 (7.4, 22.1)             |
| South Africa         | 2017-2021 | 804  | 7   | 0.7 (0.6, 1.7)                  | 0.7 (0.5, 1.2)                  | 18.5 (12.3, 34.9)              | 14.4 (10.3, 24.6)            |

**Supplemental Table 10. Characteristics of CHAMPS cases consented for MITS and with neural tube defects anywhere in the mortality causal chain, by site.**

|                                             | <b>Bangladesh</b><br>2017-2021<br>MITS = 309<br>NTD <sup>1</sup> = 4<br>n (%) <sup>2</sup> | <b>Ethiopia</b><br>2019-2021<br>MITS = 311<br>NTD <sup>1</sup> = 44<br>n (%) <sup>2</sup> | <b>Kenya</b><br>2017-2021<br>MITS = 560<br>NTD <sup>1</sup> = 1<br>n (%) <sup>2</sup> | <b>Mali</b><br>2017-2021<br>MITS = 208<br>NTD <sup>1</sup> = 0<br>n (%) <sup>2</sup> | <b>Mozambique</b><br>2017-2021<br>MITS = 583<br>NTD <sup>1</sup> = 9<br>n (%) <sup>2</sup> | <b>Sierra Leone</b><br>2018-2021<br>MITS = 416<br>NTD <sup>1</sup> = 4<br>n (%) <sup>2</sup> | <b>South Africa</b><br>2017-2021<br>MITS = 845<br>NTD <sup>1</sup> = 7<br>n (%) <sup>2</sup> | <b>Total</b><br>2017-2021<br>MITS = 3232<br>NTD <sup>1</sup> = 69<br>n (%) <sup>2</sup> |
|---------------------------------------------|--------------------------------------------------------------------------------------------|-------------------------------------------------------------------------------------------|---------------------------------------------------------------------------------------|--------------------------------------------------------------------------------------|--------------------------------------------------------------------------------------------|----------------------------------------------------------------------------------------------|----------------------------------------------------------------------------------------------|-----------------------------------------------------------------------------------------|
| <b>Case characteristics</b>                 |                                                                                            |                                                                                           |                                                                                       |                                                                                      |                                                                                            |                                                                                              |                                                                                              |                                                                                         |
| <b>Age group<sup>3</sup></b>                |                                                                                            |                                                                                           |                                                                                       |                                                                                      |                                                                                            |                                                                                              |                                                                                              |                                                                                         |
| Stillbirths                                 | 2 (50.0)                                                                                   | 38 (86.4)                                                                                 | 0 (0.0)                                                                               | 0 (0.0)                                                                              | 6 (66.7)                                                                                   | 3 (75.0)                                                                                     | 2 (28.6)                                                                                     | 51 (73.9)                                                                               |
| Deaths <24 hours                            | 1 (25.0)                                                                                   | 4 (9.0)                                                                                   | 0 (0.0)                                                                               | 0 (0.0)                                                                              | 2 (22.2)                                                                                   | 1 (25.0)                                                                                     | 1 (14.3)                                                                                     | 9 (13.0)                                                                                |
| Early neonates, 1-6 days                    | 0 (0.0)                                                                                    | 0 (0.0)                                                                                   | 1 (100.0)                                                                             | 0 (0.0)                                                                              | 1 (11.1)                                                                                   | 0 (0.0)                                                                                      | 2 (28.6)                                                                                     | 4 (5.8)                                                                                 |
| Late neonates, 7-27 days                    | 1 (25.0)                                                                                   | 1 (2.3)                                                                                   | 0 (0.0)                                                                               | 0 (0.0)                                                                              | 0 (0.0)                                                                                    | 0 (0.0)                                                                                      | 1 (14.3)                                                                                     | 3 (4.4)                                                                                 |
| Infants, 28-364 days                        | 0 (0.0)                                                                                    | 1 (2.3)                                                                                   | 0 (0.0)                                                                               | 0 (0.0)                                                                              | 0 (0.0)                                                                                    | 0 (0.0)                                                                                      | 1 (14.3)                                                                                     | 2 (2.9)                                                                                 |
| Children, 1-5 years                         | 0 (0.0)                                                                                    | 0 (0.0)                                                                                   | 0 (0.0)                                                                               | 0 (0.0)                                                                              | 0 (0.0)                                                                                    | 0 (0.0)                                                                                      | 0 (0.0)                                                                                      | 0 (0.0)                                                                                 |
| <b>Sex</b>                                  |                                                                                            |                                                                                           |                                                                                       |                                                                                      |                                                                                            |                                                                                              |                                                                                              |                                                                                         |
| Male                                        | 2 (50.0)                                                                                   | 9 (20.5)                                                                                  | 0 (0.0)                                                                               | 0 (0.0)                                                                              | 2 (22.2)                                                                                   | 0 (0.0)                                                                                      | 2 (28.6)                                                                                     | 15 (21.7)                                                                               |
| Female                                      | 2 (50.0)                                                                                   | 35 (79.6)                                                                                 | 1 (100.0)                                                                             | 0 (0.0)                                                                              | 7 (77.8)                                                                                   | 4 (100.0)                                                                                    | 5 (71.4)                                                                                     | 54 (78.3)                                                                               |
| <b>Location of death</b>                    |                                                                                            |                                                                                           |                                                                                       |                                                                                      |                                                                                            |                                                                                              |                                                                                              |                                                                                         |
| Community                                   | 0 (0.0)                                                                                    | 1 (2.3)                                                                                   | 0 (0.0)                                                                               | 0 (0.0)                                                                              | 0 (0.0)                                                                                    | 0 (0.0)                                                                                      | 0 (0.0)                                                                                      | 1 (1.5)                                                                                 |
| Facility                                    | 4 (100.0)                                                                                  | 43 (97.7)                                                                                 | 1 (100.0)                                                                             | 0 (0.0)                                                                              | 9 (100.0)                                                                                  | 4 (100.0)                                                                                    | 7 (100.0)                                                                                    | 68 (98.6)                                                                               |
| <b>Year of death</b>                        |                                                                                            |                                                                                           |                                                                                       |                                                                                      |                                                                                            |                                                                                              |                                                                                              |                                                                                         |
| 2017                                        | 0 (0.0)                                                                                    | 0 (0.0)                                                                                   | 0 (0.0)                                                                               | 0 (0.0)                                                                              | 0 (0.0)                                                                                    | 0 (0.0)                                                                                      | 3 (42.9)                                                                                     | 3 (4.4)                                                                                 |
| 2018                                        | 1 (25.0)                                                                                   | 0 (0.0)                                                                                   | 0 (0.0)                                                                               | 0 (0.0)                                                                              | 0 (0.0)                                                                                    | 0 (0.0)                                                                                      | 1 (14.3)                                                                                     | 2 (2.9)                                                                                 |
| 2019                                        | 1 (25.0)                                                                                   | 4 (9.0)                                                                                   | 1 (100.0)                                                                             | 0 (0.0)                                                                              | 6 (66.7)                                                                                   | 2 (50.0)                                                                                     | 2 (28.6)                                                                                     | 16 (23.2)                                                                               |
| 2020                                        | 1 (25.0)                                                                                   | 15 (34.1)                                                                                 | 0 (0.0)                                                                               | 0 (0.0)                                                                              | 2 (22.2)                                                                                   | 1 (25.0)                                                                                     | 0 (0.0)                                                                                      | 19 (27.5)                                                                               |
| 2021                                        | 1 (25.0)                                                                                   | 25 (56.8)                                                                                 | 0 (0.0)                                                                               | 0 (0.0)                                                                              | 1 (11.1)                                                                                   | 1 (25.0)                                                                                     | 1 (14.3)                                                                                     | 29 (42.0)                                                                               |
| <b>Season of death<sup>4</sup></b>          |                                                                                            |                                                                                           |                                                                                       |                                                                                      |                                                                                            |                                                                                              |                                                                                              |                                                                                         |
| Dry                                         | 4 (100.0)                                                                                  | 35 (79.6)                                                                                 | 0 (0.0)                                                                               | 0 (0.0)                                                                              | 5 (55.6)                                                                                   | 4 (100.0)                                                                                    | 5 (71.4)                                                                                     | 53 (76.8)                                                                               |
| Rainy                                       | 0 (0.0)                                                                                    | 9 (20.5)                                                                                  | 1 (100.0)                                                                             | 0 (0.0)                                                                              | 4 (44.4)                                                                                   | 0 (0.0)                                                                                      | 2 (28.6)                                                                                     | 16 (23.2)                                                                               |
| <b>VA CoD<sup>5,6</sup></b>                 |                                                                                            |                                                                                           |                                                                                       |                                                                                      |                                                                                            |                                                                                              |                                                                                              |                                                                                         |
| Infection                                   | 0 (0.0)                                                                                    | 0 (0.0)                                                                                   | 0 (0.0)                                                                               | 0 (0.0)                                                                              | 0 (0.0)                                                                                    | 0 (0.0)                                                                                      | 0 (0.0)                                                                                      | 0 (0.0)                                                                                 |
| Trauma                                      | 0 (0.0)                                                                                    | 0 (0.0)                                                                                   | 0 (0.0)                                                                               | 0 (0.0)                                                                              | 0 (0.0)                                                                                    | 0 (0.0)                                                                                      | 0 (0.0)                                                                                      | 0 (0.0)                                                                                 |
| Other                                       | 4 (100.0)                                                                                  | 44 (100.0)                                                                                | 1 (100.0)                                                                             | 0 (0.0)                                                                              | 6 (100.0)                                                                                  | 4 (100.0)                                                                                    | 5 (100.0)                                                                                    | 64 (100.0)                                                                              |
| <b>Maternal characteristics<sup>7</sup></b> |                                                                                            |                                                                                           |                                                                                       |                                                                                      |                                                                                            |                                                                                              |                                                                                              |                                                                                         |
| <b>Age at delivery<sup>6</sup></b>          |                                                                                            |                                                                                           |                                                                                       |                                                                                      |                                                                                            |                                                                                              |                                                                                              |                                                                                         |
| <20 years                                   | 0 (0.0)                                                                                    | 5 (16.7)                                                                                  | 0 (0.0)                                                                               | 0 (0.0)                                                                              | 1 (12.5)                                                                                   | 0 (0.0)                                                                                      | 0 (0.0)                                                                                      | 6 (12.5)                                                                                |
| 20-24 years                                 | 2 (66.7)                                                                                   | 7 (23.3)                                                                                  | 0 (0.0)                                                                               | 0 (0.0)                                                                              | 2 (25.0)                                                                                   | 2 (50.0)                                                                                     | 1 (50.0)                                                                                     | 14 (29.2)                                                                               |
| 25-29 years                                 | 1 (33.3)                                                                                   | 9 (30.0)                                                                                  | 0 (0.0)                                                                               | 0 (0.0)                                                                              | 2 (25.0)                                                                                   | 1 (25.0)                                                                                     | 1 (50.0)                                                                                     | 14 (29.2)                                                                               |
| ≥30 years                                   | 0 (0.0)                                                                                    | 9 (30.0)                                                                                  | 1 (100.0)                                                                             | 0 (0.0)                                                                              | 3 (37.5)                                                                                   | 1 (25.0)                                                                                     | 0 (0.0)                                                                                      | 14 (29.2)                                                                               |
| <b>Affiliated religion<sup>6</sup></b>      |                                                                                            |                                                                                           |                                                                                       |                                                                                      |                                                                                            |                                                                                              |                                                                                              |                                                                                         |
| Christian                                   | 0 (0.0)                                                                                    | 6 (14.6)                                                                                  | 1 (100.0)                                                                             | 0 (0.0)                                                                              | 5 (83.3)                                                                                   | 2 (50.0)                                                                                     | 3 (100.0)                                                                                    | 17 (28.8)                                                                               |
| Hindu                                       | 1 (25.0)                                                                                   | 0 (0.0)                                                                                   | 0 (0.0)                                                                               | 0 (0.0)                                                                              | 0 (0.0)                                                                                    | 0 (0.0)                                                                                      | 0 (0.0)                                                                                      | 1 (1.7)                                                                                 |
| Muslim                                      | 3 (75.0)                                                                                   | 35 (85.4)                                                                                 | 0 (0.0)                                                                               | 0 (0.0)                                                                              | 1 (16.7)                                                                                   | 2 (0.0)                                                                                      | 0 (0.0)                                                                                      | 41 (69.5)                                                                               |
| Other                                       | 0 (0.0)                                                                                    | 0 (0.0)                                                                                   | 0 (0.0)                                                                               | 0 (0.0)                                                                              | 0 (0.0)                                                                                    | 0 (0.0)                                                                                      | 0 (0.0)                                                                                      | 0 (0.0)                                                                                 |
| <b>Education<sup>6</sup></b>                |                                                                                            |                                                                                           |                                                                                       |                                                                                      |                                                                                            |                                                                                              |                                                                                              |                                                                                         |
| None                                        | 0 (0.0)                                                                                    | 1 (100.0)                                                                                 | 0 (0.0)                                                                               | 0 (0.0)                                                                              | 1 (33.3)                                                                                   | 0 (0.0)                                                                                      | 0 (0.0)                                                                                      | 2 (28.6)                                                                                |
| Primary                                     | 1 (50.0)                                                                                   | 0 (0.0)                                                                                   | 0 (0.0)                                                                               | 0 (0.0)                                                                              | 0 (0.0)                                                                                    | 0 (0.0)                                                                                      | 0 (0.0)                                                                                      | 1 (14.3)                                                                                |
| Secondary                                   | 1 (50.0)                                                                                   | 0 (0.0)                                                                                   | 0 (0.0)                                                                               | 0 (0.0)                                                                              | 1 (33.3)                                                                                   | 0 (0.0)                                                                                      | 0 (0.0)                                                                                      | 2 (28.6)                                                                                |
| Tertiary                                    | 0 (0.0)                                                                                    | 0 (0.0)                                                                                   | 0 (0.0)                                                                               | 0 (0.0)                                                                              | 1 (33.3)                                                                                   | 0 (0.0)                                                                                      | 1 (100.0)                                                                                    | 2 (28.6)                                                                                |
| <b>Alcohol during pregnancy<sup>6</sup></b> |                                                                                            |                                                                                           |                                                                                       |                                                                                      |                                                                                            |                                                                                              |                                                                                              |                                                                                         |
| Yes                                         | 0 (0.0)                                                                                    | 0 (0.0)                                                                                   | 0 (0.0)                                                                               | 0 (0.0)                                                                              | 0 (0.0)                                                                                    | 0 (0.0)                                                                                      | 0 (0.0)                                                                                      | 0 (0.0)                                                                                 |
| No                                          | 3 (100.0)                                                                                  | 5 (100.0)                                                                                 | 0 (0.0)                                                                               | 0 (0.0)                                                                              | 2 (100.0)                                                                                  | 4 (100.0)                                                                                    | 2 (100.0)                                                                                    | 16 (100.0)                                                                              |
| <b>Smoking during pregnancy<sup>6</sup></b> |                                                                                            |                                                                                           |                                                                                       |                                                                                      |                                                                                            |                                                                                              |                                                                                              |                                                                                         |
| Yes                                         | 0 (0.0)                                                                                    | 0 (0.0)                                                                                   | 0 (0.0)                                                                               | 0 (0.0)                                                                              | 0 (0.0)                                                                                    | 0 (0.0)                                                                                      | 0 (0.0)                                                                                      | 0 (0.0)                                                                                 |
| No                                          | 3 (100.0)                                                                                  | 5 (100.0)                                                                                 | 0 (0.0)                                                                               | 0 (0.0)                                                                              | 2 (100.0)                                                                                  | 4 (100.0)                                                                                    | 2 (100.0)                                                                                    | 16 (100.0)                                                                              |
| <b>Number of ANC visits<sup>6</sup></b>     |                                                                                            |                                                                                           |                                                                                       |                                                                                      |                                                                                            |                                                                                              |                                                                                              |                                                                                         |
| 0                                           | 0 (0.0)                                                                                    | 10 (62.5)                                                                                 | 0 (0.0)                                                                               | 0 (0.0)                                                                              | 0 (0.0)                                                                                    | 0 (0.0)                                                                                      | 0 (0.0)                                                                                      | 10 (31.3)                                                                               |
| 1-2                                         | 2 (66.7)                                                                                   | 3 (18.8)                                                                                  | 0 (0.0)                                                                               | 0 (0.0)                                                                              | 0 (0.0)                                                                                    | 0 (0.0)                                                                                      | 2 (100.0)                                                                                    | 7 (21.9)                                                                                |
| 3-4                                         | 1 (33.3)                                                                                   | 1 (6.3)                                                                                   | 0 (0.0)                                                                               | 0 (0.0)                                                                              | 5 (71.4)                                                                                   | 2 (66.7)                                                                                     | 0 (0.0)                                                                                      | 9 (28.1)                                                                                |
| 5-6                                         | 0 (0.0)                                                                                    | 2 (12.5)                                                                                  | 0 (0.0)                                                                               | 0 (0.0)                                                                              | 1 (14.3)                                                                                   | 1 (33.3)                                                                                     | 0 (0.0)                                                                                      | 4 (12.5)                                                                                |
| 7-8                                         | 0 (0.0)                                                                                    | 0 (0.0)                                                                                   | 0 (0.0)                                                                               | 0 (0.0)                                                                              | 1 (14.3)                                                                                   | 0 (0.0)                                                                                      | 0 (0.0)                                                                                      | 1 (3.1)                                                                                 |
| 9-10                                        | 0 (0.0)                                                                                    | 0 (0.0)                                                                                   | 1 (100.0)                                                                             | 0 (0.0)                                                                              | 0 (0.0)                                                                                    | 0 (0.0)                                                                                      | 0 (0.0)                                                                                      | 1 (3.1)                                                                                 |

ANC, antenatal clinic; BD, Bangladesh; CBD, congenital birth defects; CHAMPS, Child Health and Mortality Prevention Surveillance Network; CoD, cause of death; ET, Ethiopia; ICD-10, International Classification of Diseases, Revision 10; KE, Kenya; MITS, minimally invasive tissue sampling; ML, Mali; MZ, Mozambique; NTD, neural tube defects; SL, Sierra Leone; VA, verbal autopsy; ZA, South Africa.

<sup>1</sup>NTD, ICD-10 codes Q00.0, Q00.1, Q00.2, Q01.0-Q01.9, Q05.0-Q05.9.

<sup>2</sup>Percentages (column distributions) may not sum to 100% due to rounding.

<sup>3</sup>Stillbirths [no spontaneous breathing or movement at time of delivery and (1) weighing >1 kg and/or (2) estimated gestational age ≥28 weeks]; neonates (1-28 days); infants (29-364 days); children (1-5 years).

<sup>4</sup>Dry, rainy: BD (November – May, June – October); ET (October – May, June – September); KE (July & December – March, April – June & August – November);

ML (November – May, June – October); MZ (May – October, November – April); SL (October – May, June – September); ZA (March – November, December – February).

<sup>5</sup>Inter-VA algorithm: Infection (ICD-10 codes 01, 10.3-10.5); trauma (ICD-10 code 12).

<sup>6</sup>Missing: VA CoD (MZ, n=3; ZA, n=2); age at delivery (BD, n=1; ET, n=14; MZ, n=1; ZA, n=5); religion (ET, n=3; MZ, n=3; ZA, n=4);

education (BD, n=2; ET, n=43; KE, n=1; MZ, n=6; SL, n=4; ZA, n=6); alcohol consumption during pregnancy (BD, n=1; ET, n=39; KE, n=1; MZ, n=7; ZA, n=5);

smoking during pregnancy (BD, n=1; ET, n=39; KE, n=1; MZ, n=7; ZA, n=5); number of ANC visits (BD, n=1; ET, n=28; MZ, n=2; SL, n=1; ZA, n=5).

<sup>7</sup>All characteristics pertinent to time of pregnancy.

**Supplemental Table 11. Frequency of co-occurring causes of death among CHAMPS cases consented for MITS and with NTDs anywhere in the mortality causal chain (2017-2021).**

| Co-occurring cause of death                   | Bangladesh | Ethiopia | Kenya | Mali | Mozambique | Sierra Leone | South Africa | Total |
|-----------------------------------------------|------------|----------|-------|------|------------|--------------|--------------|-------|
| Perinatal asphyxia/hypoxia <sup>2-3</sup>     | 2          | 10       | 0     | 0    | 0          | 2            | 0            | 14    |
| Other congenital birth defects <sup>2-3</sup> | 1          | 2        | 0     | 0    | 0          | 0            | 0            | 3     |
| Sepsis <sup>2-3</sup>                         | 1          | 4        | 0     | 0    | 0          | 0            | 2            | 7     |
| Congenital infections <sup>2-3</sup>          | 0          | 2        | 0     | 0    | 0          | 0            | 0            | 2     |
| Lower respiratory infections <sup>2-3</sup>   | 0          | 1        | 0     | 0    | 0          | 0            | 2            | 3     |
| Meningitis/encephalitis <sup>2-3</sup>        | 0          | 2        | 0     | 0    | 0          | 0            | 1            | 3     |
| None – only NTD                               | 2          | 31       | 1     | 0    | 9          | 2            | 4            | 49    |
| Total                                         | 6          | 52       | 1     | 0    | 9          | 4            | 9            | 81    |

CHAMPS, Child Health and Mortality Prevention Surveillance Network; GBD, global burden of disease; ICD-10, International Classification of Diseases, Revision 10; IHME, Institute for Health Metrics and Evaluation; MITS, minimally invasive tissue sampling; NTD, neural tube defects. <sup>1</sup>Baliankandi, Bangladesh

(2017-2021); Harar and Kersa (2019-2021), and Haramaya (2020-2021), Ethiopia; Kisumu, Kenya (2017-2021); Bamako, Mali (2017-2021); Manhica and Quelimane, Mozambique (2017-2021); Makeni, Sierra Leone (2018-2021); Soweto, South Africa (2017-2021).

<sup>2</sup>ICD-10 codes categorized using IHME GBD categories.

<sup>3</sup>Includes immediate, underlying, and comorbid causes of death 1-8.

NTD ICD-10 codes: anencephaly (Q00.0), craniorachischisis (Q00.1), iniencephaly (Q00.2), encephalocele (Q01.0-Q01.9), spina bifida (Q05.0-Q05.9).

**Supplemental Table 12. Folic acid fortification policy and fortification characteristics in CHAMPS sites.**

| Site         | Folic acid fortification policy, fortification food vehicle, and nutrient levels in fortification standard <sup>1</sup> | Fortification program performance <sup>1,2</sup> |
|--------------|-------------------------------------------------------------------------------------------------------------------------|--------------------------------------------------|
| Bangladesh   | Voluntary fortification – Rice (1·7 mg/kg)                                                                              | Rice that is fortified = 2%                      |
|              | Voluntary fortification – Wheat flour (2 mg/kg)                                                                         | Wheat flour that is fortified = 0%               |
| Ethiopia     | Voluntary fortification – Wheat flour (2 mg/kg)                                                                         | Wheat flour that is fortified = 0%               |
| Kenya        | Mandatory fortification – Maize flour (1·5 mg/kg)                                                                       | Wheat flour that is fortified = 35%              |
|              | Mandatory fortification – Wheat flour (1·5 mg/kg)                                                                       | Maize flour that is fortified = 28%              |
| Mali         | Mandatory fortification – Wheat flour (2·5 mg/kg)                                                                       | Wheat flour that is fortified = 90%              |
| Mozambique   | Mandatory fortification – Maize flour (2 mg/kg)                                                                         | Maize flour that is fortified = 70%              |
|              | Mandatory fortification – Wheat flour (2 mg/kg)                                                                         | Wheat flour that is fortified = 60%              |
| Sierra Leone | Voluntary fortification – Wheat flour (2·08 mg/kg)                                                                      | Wheat flour that is fortified = 90%              |
| South Africa | Mandatory fortification – Wheat flour (1·43 mg/kg)                                                                      | Wheat flour that is fortified = 90%              |
|              | Mandatory fortification – Maize flour (2 mg/kg)                                                                         | Maize flour that is fortified = 50%              |

<sup>1</sup>Global Fortification Data Exchange. Dashboard: Country Fortification. Accessed 13 Feb 2022. [<http://www.fortificationdata.org>].

<sup>2</sup>Proportion of fortification food vehicle in the country that is fortified.



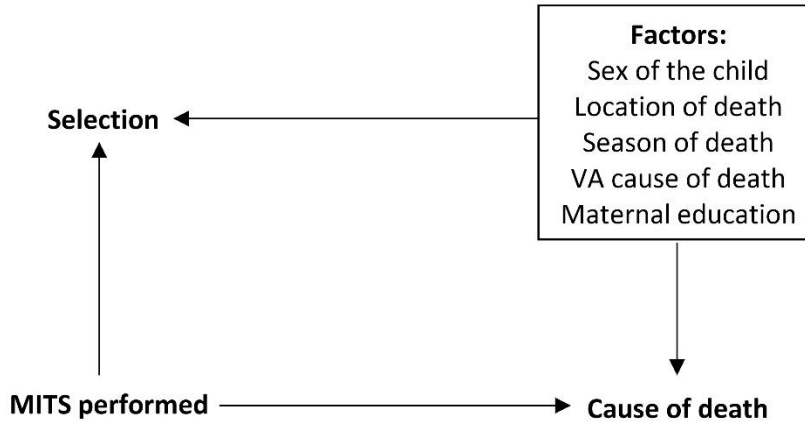

**Supplemental Figure 1. Directed acyclic graph depicting the relationship between MITS performed and cause of death among CHAMPS cases.** Estimates are susceptible to selection bias as all analysis are restricted to cases for whom MITS were performed. This biasing path may be closed by adjusting for factors known to affect both MITS consent and cause of death. CHAMPS, Child Health and Mortality Prevention Surveillance Network; MITS, minimally invasive tissue sampling; VA, verbal autopsy.

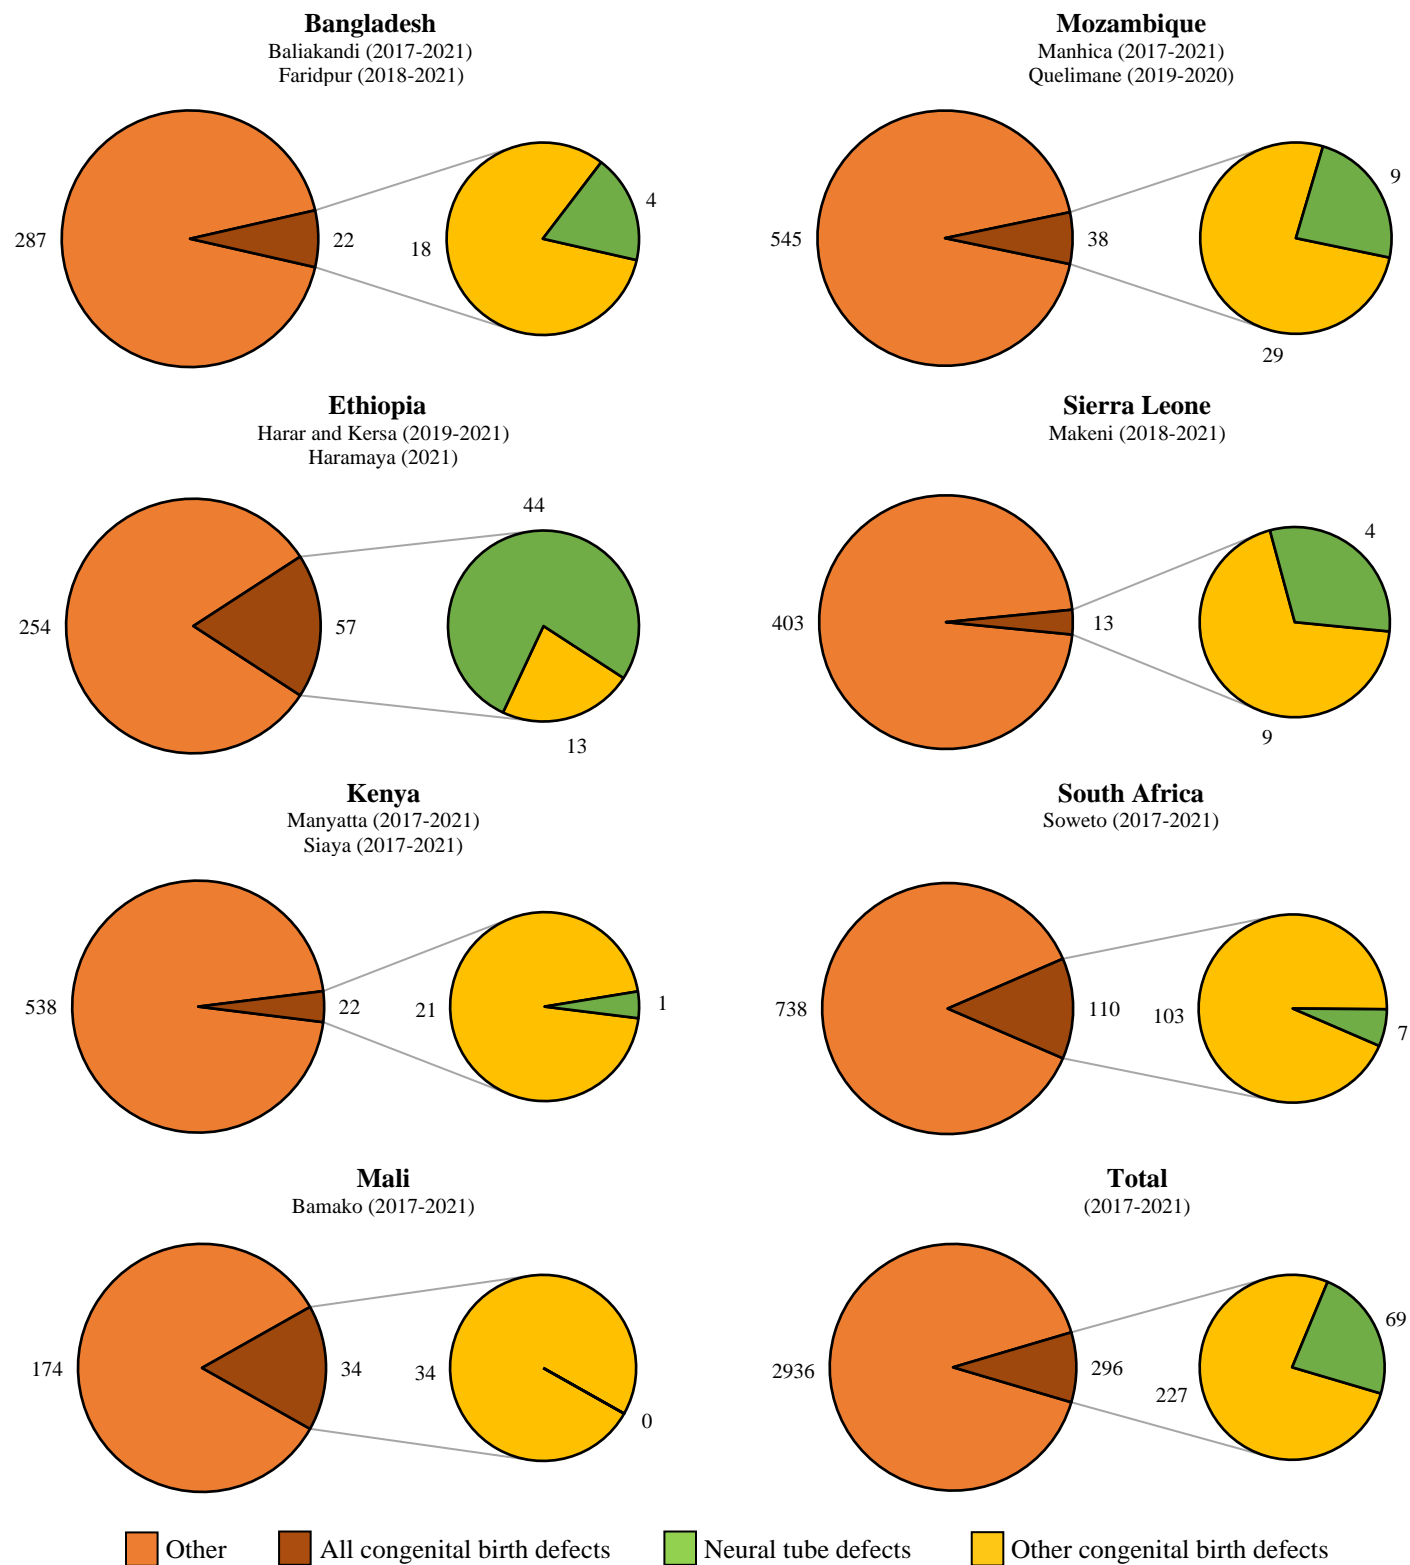

**Supplemental Figure 2. Frequency of fatal congenital birth defects and neural tube defects anywhere in the causal chain among all CHAMPS cases consented for MITS by site.** CHAMPS, Child Health and Mortality Prevention Surveillance Network; ICD-10, International Classification of Diseases, Revision 10; MITS, minimally invasive tissue sampling. Congenital birth defects, ICD-10 codes G71, G80, Q00-Q99; neural tube defects, ICD-10 codes Q00-Q00.0, Q00.1, Q00.2, Q01-Q01.9, Q05-Q05.9. Includes immediate, underlying, and comorbid causes of death 1-8.
